# Supplementary material
Source: Springer Nature journal article supplement (https://www.springermedizin.de/resource/supplementary/12931_2010_1057_MOESM2_ESM.pdf/9425540)

**Normoxia****Chronic hypoxia****Monocrotaline****Cx 37**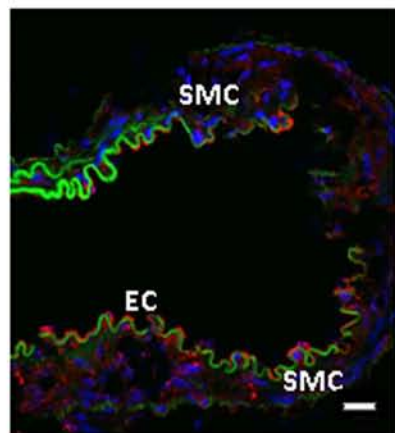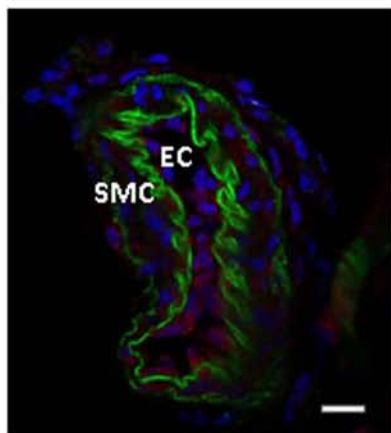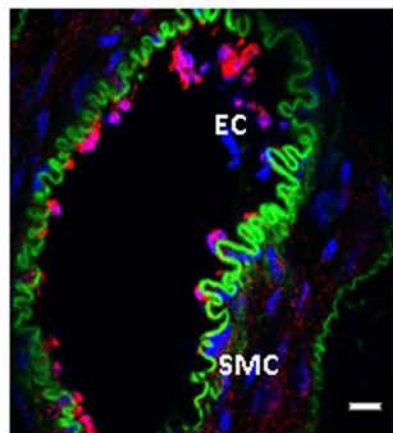**Cx 40**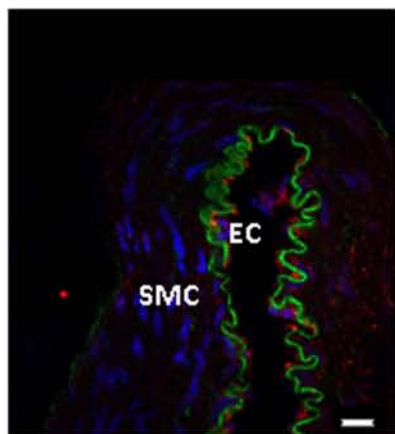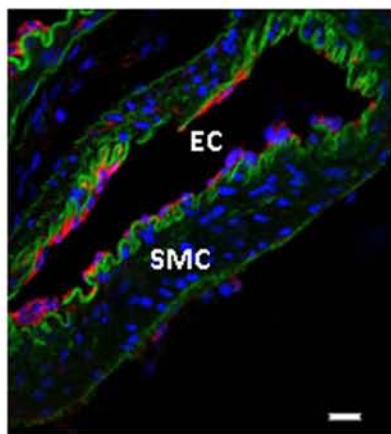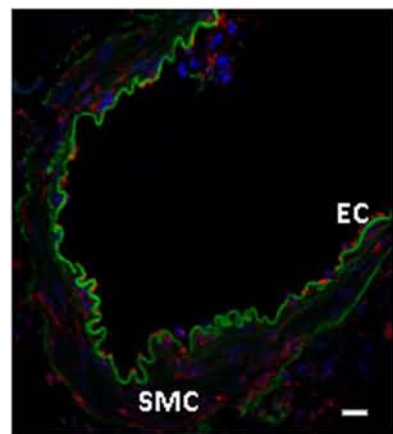**Cx 43**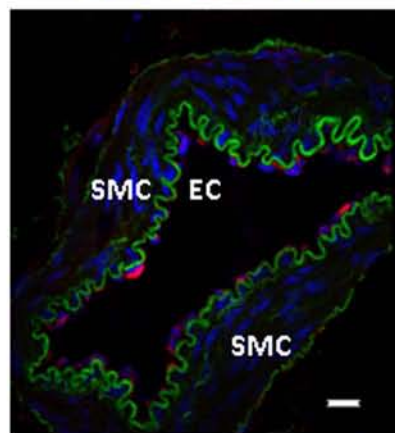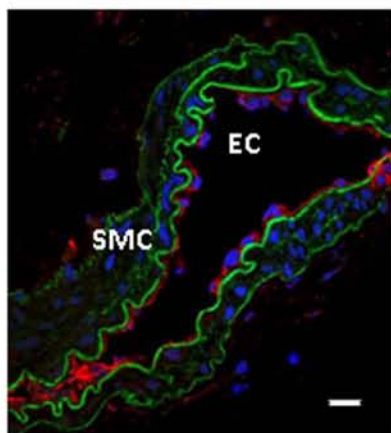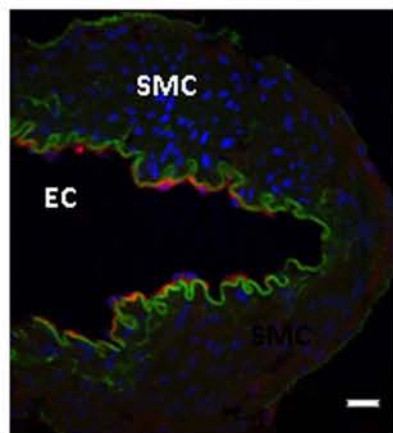

Supplement: MOESM2 [file 9425540]
